# Supplementary material for: Distinct genomic subclasses of high-grade/progressive meningiomas: NF2-associated, NF2-exclusive, and NF2-agnostic
Source: PubMed Central journal article supplement (PMC7580027; doi:10.1186/s40478-020-01040-2), 2020-10-21
Supplement: 40478_2020_1040_MOESM2_ESM.pdf [file 40478_2020_1040_MOESM2_ESM.pdf]

Aneuploidy    ■ Gain    ■ Loss    □ None

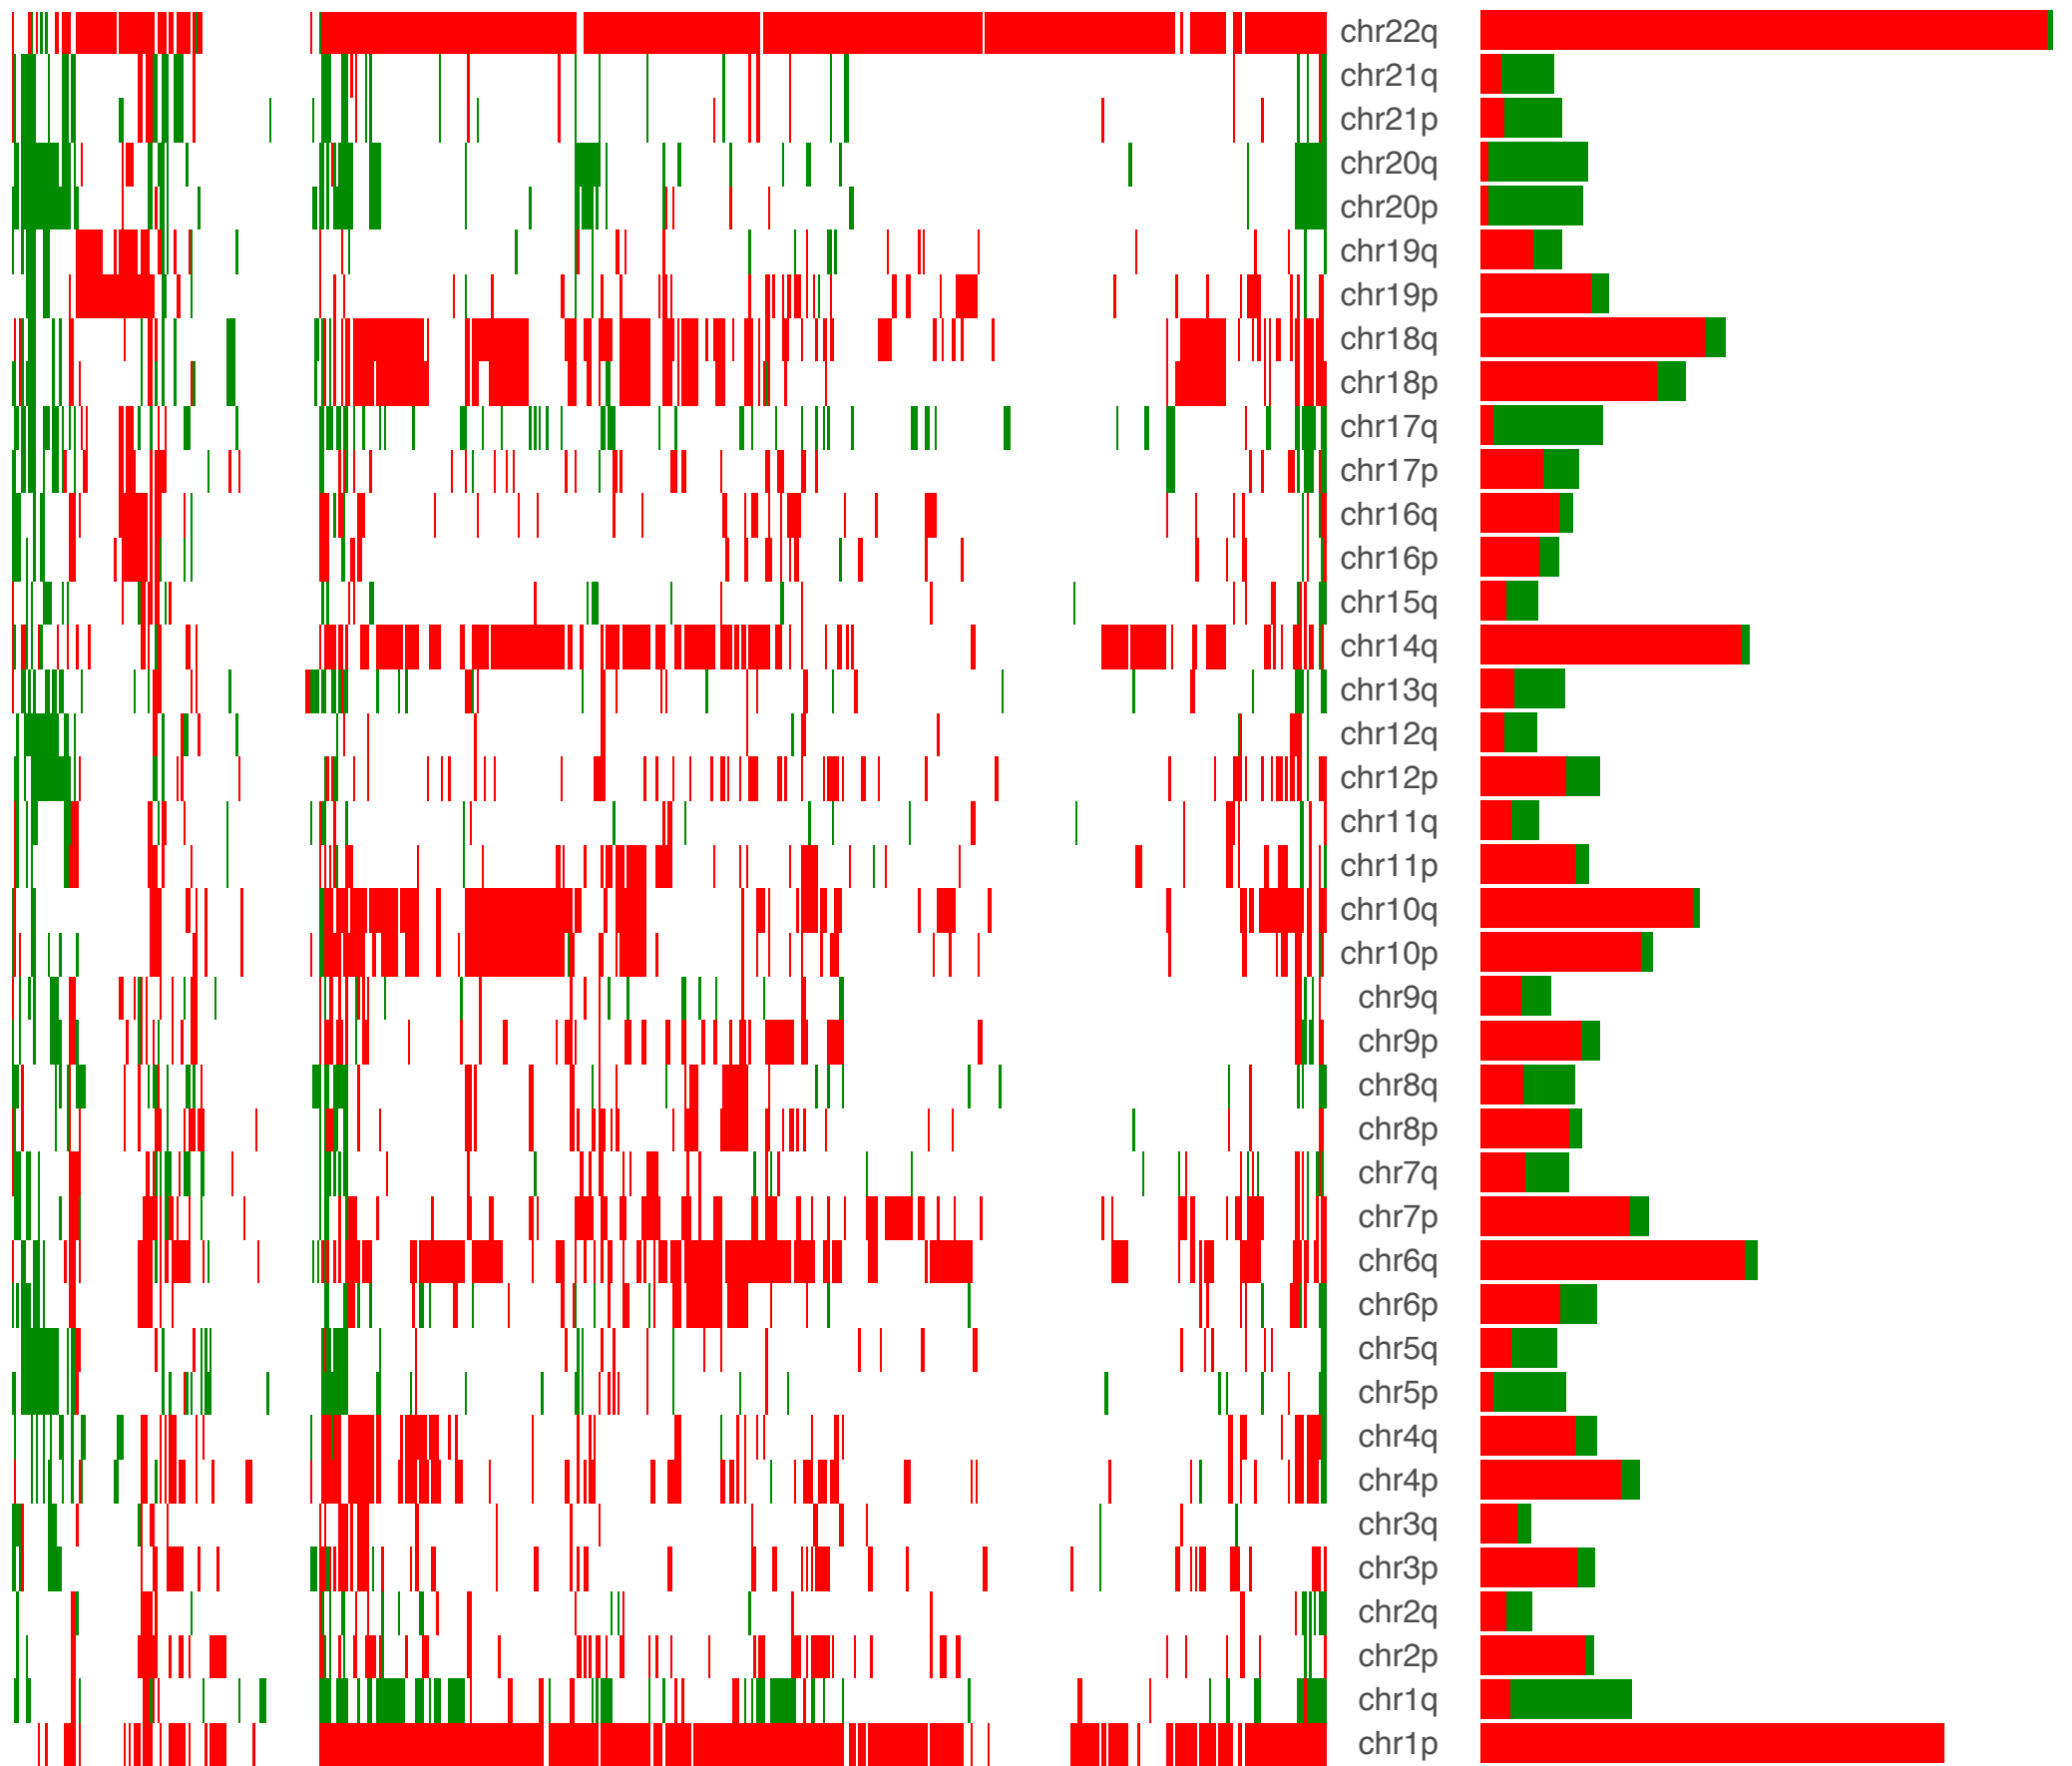

Percentage of samples
